# Supplementary material for: Exploring the pharmacological effects and potential targets of paeoniflorin on the endometriosis of cold coagulation and blood stasis model rats by ultra-performance liquid chromatography tandem mass spectrometry with a pattern recognition approach
Source: Royal Society of Chemistry journal article supplement (doi:10.1039/c9ra03525g), 2019-01-01
Supplement: c9ra03525g1.pdf [file c9ra03525g1.pdf]

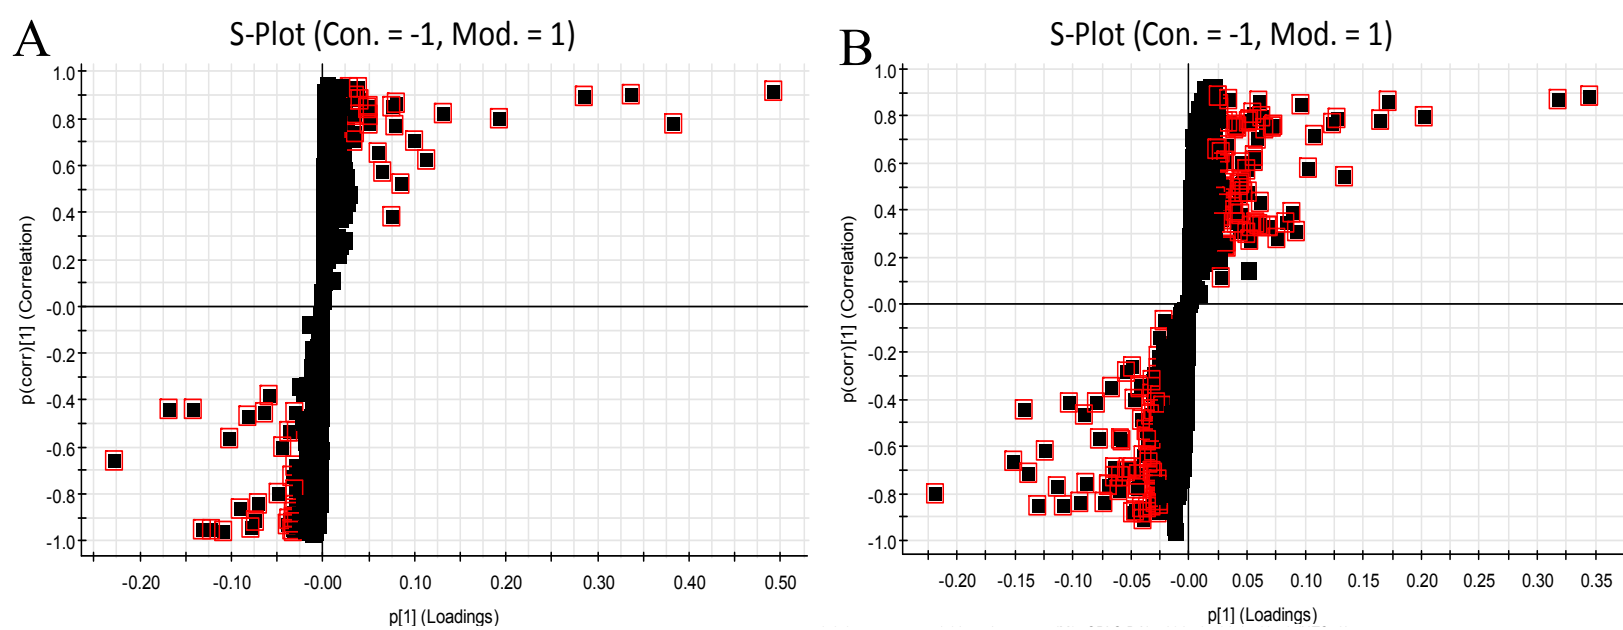

Supplementary Figure 1 S-plot of serum profile of control group and model group scanned by positive ion mode and negative ion mode. (OPLS-DA).

Note: A: In the positive ion mode, B: In the negative ion mode; Con: the sham group, Mod: the model group

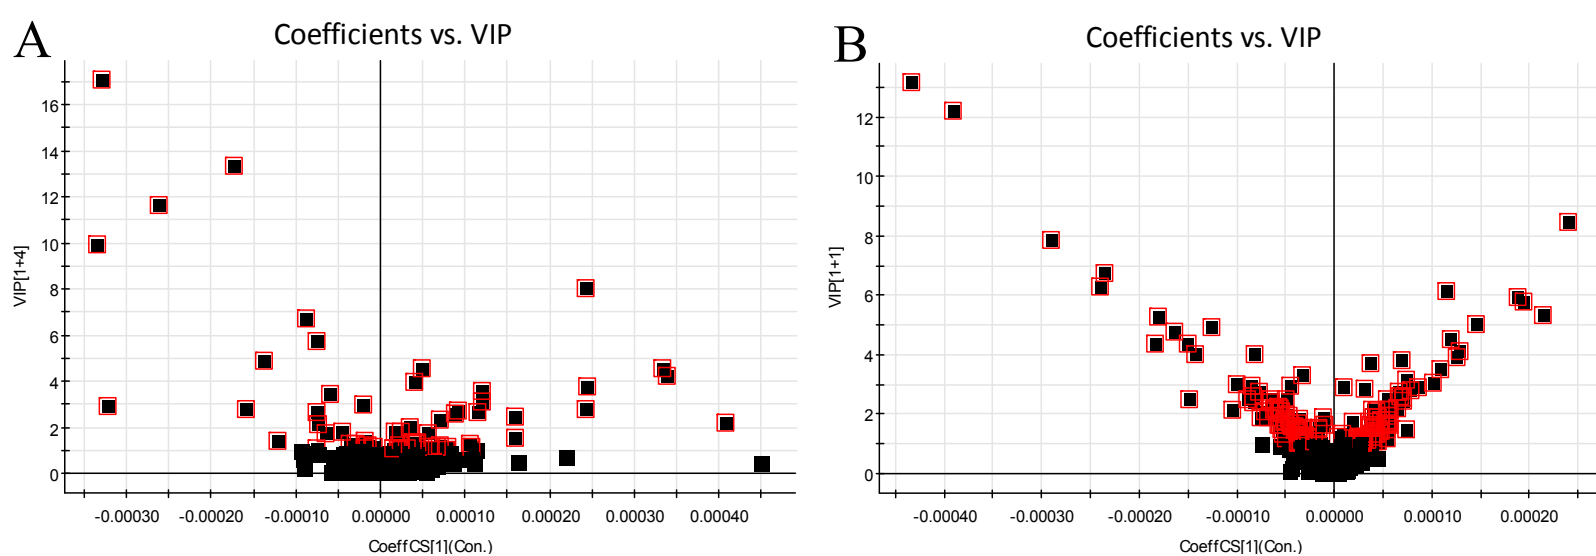

Supplementary Figure 2 VIP-plot of serum profile of control group and model group scanned by positive ion mode and negative ion mode. (OPLS-DA)

Note: A: In the positive ion mode, B: In the negative ion mode; Con: the sham group, Mod: the model group

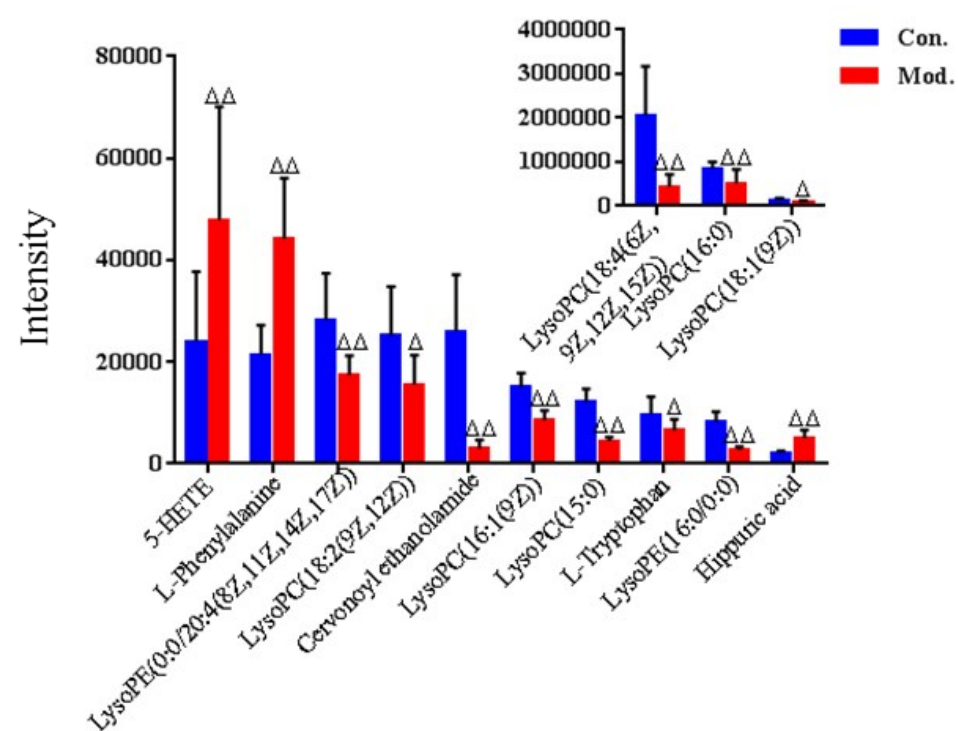

Supplementary Figure 3 Content changes of potential biomarkers in ECB model serum by positive ion mode.

Note:  $\Delta P < 0.05$ ,  $\Delta\Delta P < 0.01$ , compared with control group. Con: the sham group, Mod: the model group.

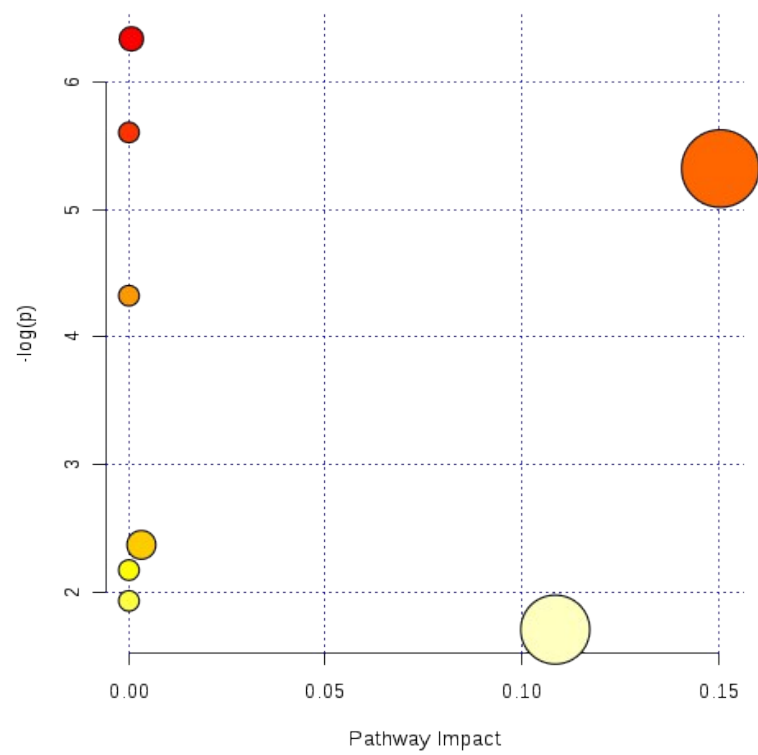

Supplementary Figure 4 Summary of network pathway analysis with MetPA software

1: Phenylalanine, tyrosine and tryptophan biosynthesis; 2: Phenylalanine metabolism; 3: Tryptophan metabolism; 4: Glycerophospholipid metabolism; 5: Arachidonic acid metabolism; 6: Aminoacyl-tRNA biosynthesis.

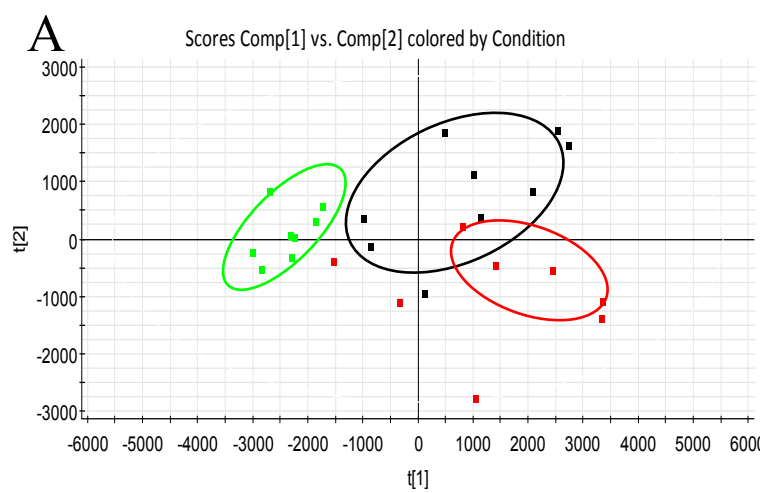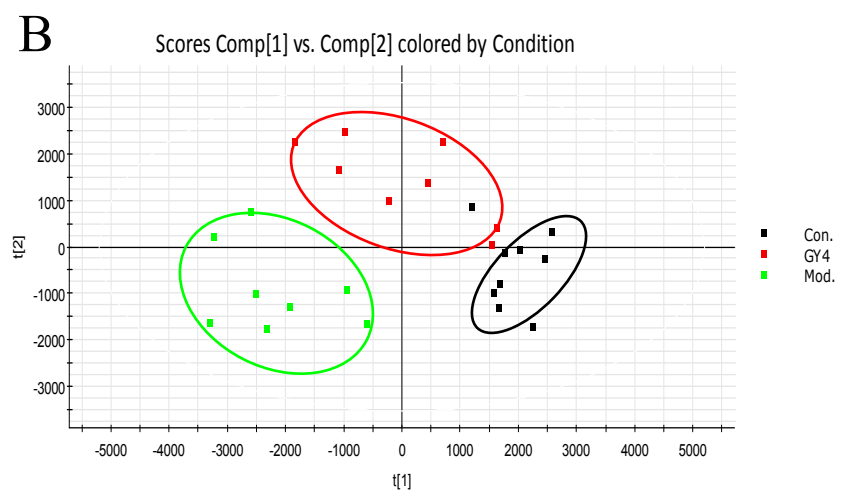

Supplementary Figure 5 Score plot of serum profile after oral administration of PF scanned by positive ion mode (A) and negative ion mode (B). (Data were analyzed by PLS-DA).

Con: the sham group, Mod: the model group, GY4: the PF group

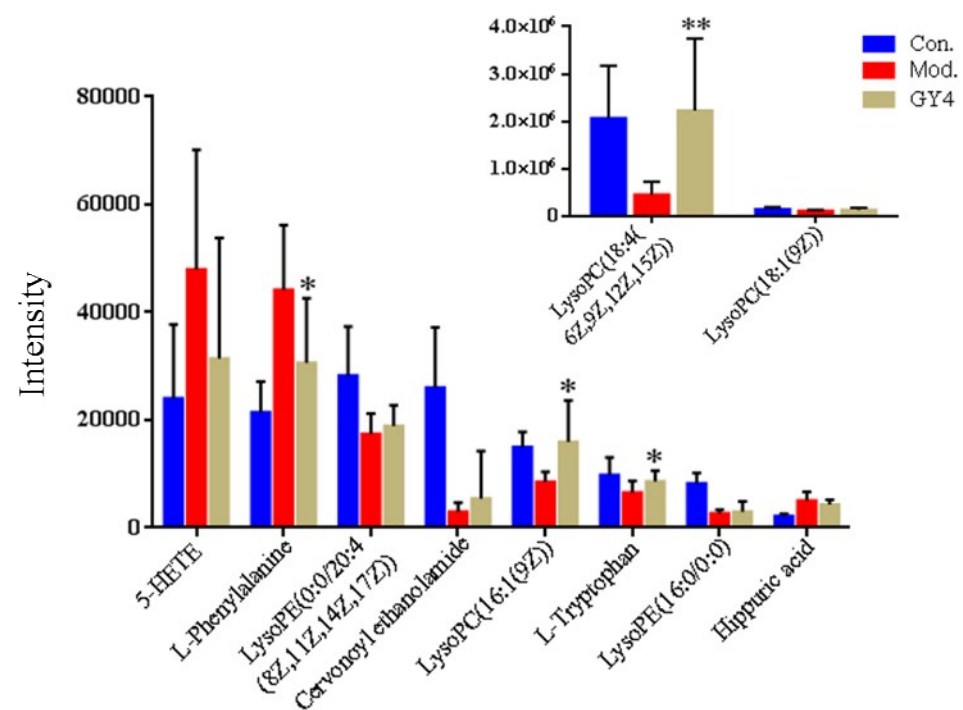

Supplementary Figure 6 Content changes of potential biomarkers of the rats in PF group by positive ion mode. Note: \*P<0.05, \*\*P<0.01, compared with the model group. Con: the sham group, Mod: the model group, GY4: the PF group.

Supplementary Table 1 MS/MS information of biomarkers in positive and negative ion mode.

| No. | Rt (min) | Actual Mass | [M-H] <sup>-</sup> /[M+H] <sup>+</sup> | Proposed Composition                                          | Postulated Identity              | MS/MS fragment ion (m/z)                                                                                                                                                                                                                                                                                                               |
|-----|----------|-------------|----------------------------------------|---------------------------------------------------------------|----------------------------------|----------------------------------------------------------------------------------------------------------------------------------------------------------------------------------------------------------------------------------------------------------------------------------------------------------------------------------------|
| 1   | 1.36     | 165.0789    | [M+H] <sup>+</sup>                     | C <sub>9</sub> H <sub>11</sub> NO <sub>2</sub>                | L-Phenylalanine                  | 166.0869[M+H] <sup>+</sup><br>151.0489[M+H-NH] <sup>+</sup><br>120.0823[M+H-CH <sub>2</sub> O <sub>2</sub> ] <sup>+</sup><br>203.08327[M-H] <sup>-</sup><br>188.9841[M-H-H <sub>2</sub> N] <sup>-</sup>                                                                                                                                |
| 2   | 1.73     | 204.0898    | [M-H] <sup>-</sup>                     | C <sub>11</sub> H <sub>12</sub> N <sub>2</sub> O <sub>2</sub> | L-Tryptophan                     | 160.0454[M-H-CHO <sub>2</sub> ] <sup>-</sup><br>130.0694[M-H-C <sub>2</sub> H <sub>5</sub> NO <sub>2</sub> ] <sup>-</sup><br>116.0563[M-H-C <sub>3</sub> H <sub>7</sub> NO <sub>2</sub> ] <sup>-</sup><br>178.0504[M-H] <sup>-</sup>                                                                                                   |
| 3   | 2.20     | 179.0582    | [M-H] <sup>-</sup>                     | C <sub>9</sub> H <sub>9</sub> NO <sub>3</sub>                 | Hippuric acid                    | 162.0572[M-H-O] <sup>-</sup><br>136.0478[M-H-CO <sub>2</sub> ] <sup>-</sup><br>121.1302[M-H-C <sub>2</sub> H <sub>2</sub> O <sub>2</sub> ] <sup>-</sup><br>514.293[M-H] <sup>-</sup>                                                                                                                                                   |
| 4   | 4.79     | 515.3011    | [M-H] <sup>-</sup>                     | C <sub>26</sub> H <sub>46</sub> NO <sub>7</sub> P             | LysoPC(18:4(6Z,9Z,12Z,15Z))      | 425.2906[M-H-C <sub>3</sub> H <sub>7</sub> NO <sub>2</sub> ] <sup>-</sup><br>407.2827[M-H-C <sub>7</sub> H <sub>7</sub> O] <sup>-</sup><br>331.1941[M-H-C <sub>6</sub> H <sub>18</sub> NO <sub>3</sub> P] <sup>-</sup><br>373.2745[M+H] <sup>+</sup>                                                                                   |
| 5   | 5.51     | 372.2664    | [M+H] <sup>+</sup>                     | C <sub>24</sub> H <sub>36</sub> O <sub>3</sub>                | Cervonoyl ethanolamide           | 319.2409[M+H-C <sub>4</sub> H <sub>6</sub> ] <sup>+</sup><br>184.0763[M+H-C <sub>14</sub> H <sub>21</sub> ] <sup>+</sup><br>147.1204[M+H-C <sub>13</sub> H <sub>22</sub> O <sub>3</sub> ] <sup>+</sup><br>494.3242[M+H] <sup>+</sup>                                                                                                   |
| 6   | 7.25     | 493.3168    | [M+H] <sup>+</sup>                     | C <sub>24</sub> H <sub>48</sub> NO <sub>7</sub> P             | LysoPC(16:1(9Z))                 | 311.2596[M+H-C <sub>5</sub> H <sub>14</sub> NO <sub>4</sub> P] <sup>+</sup><br>258.1153[M+H-C <sub>13</sub> H <sub>34</sub> NO <sub>2</sub> ] <sup>+</sup><br>184.0742[M+H-C <sub>19</sub> H <sub>36</sub> NO <sub>2</sub> ] <sup>+</sup><br>520.34[M+H] <sup>+</sup><br>483.2494[M+H-H <sub>5</sub> O <sub>2</sub> ] <sup>+</sup>     |
| 7   | 7.54     | 519.3324    | [M+H] <sup>+</sup>                     | C <sub>26</sub> H <sub>50</sub> NO <sub>7</sub> P             | LysoPC(18:2(9Z,12Z))             | 337.2709[M+H-C <sub>5</sub> H <sub>14</sub> NO <sub>4</sub> P] <sup>+</sup><br>303.0184[M+H-C <sub>13</sub> H <sub>31</sub> NO] <sup>+</sup><br>184.0740[M+H-C <sub>21</sub> H <sub>38</sub> NO <sub>2</sub> ] <sup>+</sup><br>500.279[M-H] <sup>-</sup>                                                                               |
| 8   | 7.71     | 501.2855    | [M-H] <sup>-</sup>                     | C <sub>25</sub> H <sub>44</sub> NO <sub>7</sub> P             | LysoPE(0:0/20:4(8Z,11Z,14Z,17Z)) | 325.2380[M-H-C <sub>6</sub> H <sub>10</sub> NO <sub>3</sub> P] <sup>-</sup><br>279.2303[M-H-C <sub>7</sub> H <sub>12</sub> NO <sub>5</sub> P] <sup>-</sup><br>224.0699[M-H-C <sub>18</sub> H <sub>28</sub> O <sub>2</sub> ] <sup>-</sup><br>454.2939[M+H] <sup>+</sup>                                                                 |
| 9   | 8.13     | 453.2855    | [M+H] <sup>+</sup>                     | C <sub>21</sub> H <sub>44</sub> NO <sub>7</sub> P             | LysoPE(16:0/0:0)                 | 362.2845[M+H-C <sub>2</sub> H <sub>6</sub> NO <sub>3</sub> ] <sup>+</sup><br>282.2861[M+H-C <sub>2</sub> H <sub>7</sub> NO <sub>6</sub> P] <sup>+</sup><br>184.0746[M+H-C <sub>16</sub> H <sub>32</sub> NO <sub>2</sub> ] <sup>+</sup><br>496.3404[M+H] <sup>+</sup><br>478.3301[M+H-H <sub>2</sub> O] <sup>+</sup>                    |
| 10  | 8.23     | 495.3324    | [M+H] <sup>+</sup>                     | C <sub>24</sub> H <sub>50</sub> NO <sub>7</sub> P             | LysoPC(16:0)                     | 313.2761[M+H-C <sub>5</sub> H <sub>14</sub> NO <sub>4</sub> P] <sup>+</sup><br>258.1119[M+H-C <sub>10</sub> H <sub>25</sub> NO <sub>3</sub> P] <sup>+</sup><br>184.0699[M+H-C <sub>14</sub> H <sub>35</sub> NO <sub>4</sub> P] <sup>+</sup><br>522.3563[M+H] <sup>+</sup><br>480.3441[M+H-C <sub>3</sub> H <sub>6</sub> ] <sup>+</sup> |
| 11  | 8.64     | 521.3481    | [M+H] <sup>+</sup>                     | C <sub>26</sub> H <sub>52</sub> NO <sub>7</sub> P             | LysoPC(18:1(9Z))                 | 339.2904[M+H-C <sub>6</sub> H <sub>18</sub> NO <sub>3</sub> P] <sup>+</sup><br>258.1117[M+H-C <sub>14</sub> H <sub>34</sub> NO <sub>3</sub> ] <sup>+</sup><br>184.0680[M+H-C <sub>16</sub> H <sub>37</sub> NO <sub>4</sub> P] <sup>+</sup><br>319.2278[M-H] <sup>-</sup>                                                               |
| 12  | 8.99     | 320.2351    | [M-H] <sup>-</sup>                     | C <sub>20</sub> H <sub>32</sub> O <sub>3</sub>                | 5-HETE                           | 269.2482[M-H-CH <sub>6</sub> O <sub>2</sub> ] <sup>-</sup><br>222.0830[M-H-C <sub>7</sub> H <sub>13</sub> ] <sup>-</sup><br>179.1047[M-H-C <sub>9</sub> H <sub>16</sub> O] <sup>-</sup><br>428.0325[M+H] <sup>+</sup>                                                                                                                  |
| 13  | 9.61     | 481.3168    | [M+H] <sup>+</sup>                     | C <sub>23</sub> H <sub>48</sub> NO <sub>7</sub> P             | LysoPC(15:0)                     | 361.2827[M+H-C <sub>5</sub> H <sub>13</sub> O <sub>3</sub> ] <sup>+</sup><br>184.0758[M+H-C <sub>13</sub> H <sub>33</sub> NO <sub>4</sub> P] <sup>+</sup><br>135.0766[M+H-C <sub>19</sub> H <sub>41</sub> NO <sub>4</sub> ] <sup>+</sup>                                                                                               |

Supplementary Table 2 Result from ingenuity pathway analysis with Metaboanalyst.

| No. | Pathway name                                        | Total | Expected | Hits | Raw p   | Impact  |
|-----|-----------------------------------------------------|-------|----------|------|---------|---------|
| 1   | Phenylalanine, tyrosine and tryptophan biosynthesis | 4     | 0.01712  | 1    | 0.01703 | 0.5     |
| 2   | Phenylalanine metabolism                            | 9     | 0.03852  | 1    | 0.03797 | 0.40741 |
| 3   | Tryptophan metabolism                               | 41    | 0.17546  | 1    | 0.1634  | 0.15684 |
| 4   | Glycerophospholipid metabolism                      | 30    | 0.12839  | 1    | 0.12192 | 0.04444 |
| 5   | Arachidonic acid metabolism                         | 36    | 0.15407  | 1    | 0.14475 | 0       |
| 6   | Aminoacyl-tRNA biosynthesis                         | 67    | 0.28673  | 2    | 0.02980 | 0       |

Note: Total: The total number of compound in the pathway; Hits: The number of accurate matching markers in the upload data; Raw p: Original P values obtained by pathway analysis; Impact: The affected value of pathways obtained by topological analysis.

Supplementary Table 3 Trend of serum potential biomarkers after oral administration of PF

| No. | Rt min | Actual Mass | Proposed Composition                                          | Postulated Identity              | Trend in ECB    | PF  |
|-----|--------|-------------|---------------------------------------------------------------|----------------------------------|-----------------|-----|
| 1   | 1.36   | 165.0789    | C <sub>9</sub> H <sub>11</sub> NO <sub>2</sub>                | L-Phenylalanine                  | ↑ <sup>△△</sup> | +*  |
| 2   | 1.73   | 204.0898    | C <sub>11</sub> H <sub>12</sub> N <sub>2</sub> O <sub>2</sub> | L-Tryptophan                     | ↓ <sup>△</sup>  | +*  |
| 3   | 2.20   | 179.0582    | C <sub>9</sub> H <sub>9</sub> NO <sub>3</sub>                 | Hippuric acid                    | ↑ <sup>△△</sup> | +   |
| 4   | 4.79   | 515.3011    | C <sub>26</sub> H <sub>46</sub> NO <sub>7</sub> P             | LysoPC(18:4(6Z,9Z,12Z,15Z))      | ↓ <sup>△△</sup> | +** |
| 5   | 5.51   | 372.2664    | C <sub>24</sub> H <sub>36</sub> O <sub>3</sub>                | Cervonoyl ethanolamide           | ↓ <sup>△△</sup> | +   |
| 6   | 7.25   | 493.3168    | C <sub>24</sub> H <sub>48</sub> NO <sub>7</sub> P             | LysoPC(16:1(9Z))                 | ↓ <sup>△△</sup> | +*  |
| 7   | 7.54   | 519.3324    | C <sub>26</sub> H <sub>50</sub> NO <sub>7</sub> P             | LysoPC(18:2(9Z,12Z))             | ↓ <sup>△</sup>  | -   |
| 8   | 7.71   | 501.2855    | C <sub>25</sub> H <sub>44</sub> NO <sub>7</sub> P             | LysoPE(0:0/20:4(8Z,11Z,14Z,17Z)) | ↓ <sup>△△</sup> | +   |
| 9   | 8.13   | 453.2855    | C <sub>21</sub> H <sub>44</sub> NO <sub>7</sub> P             | LysoPE(16:0/0:0)                 | ↓ <sup>△△</sup> | +   |
| 10  | 8.23   | 495.3324    | C <sub>24</sub> H <sub>50</sub> NO <sub>7</sub> P             | LysoPC(16:0)                     | ↓ <sup>△△</sup> | -   |
| 11  | 8.64   | 521.3481    | C <sub>26</sub> H <sub>52</sub> NO <sub>7</sub> P             | LysoPC(18:1(9Z))                 | ↓ <sup>△</sup>  | +   |
| 12  | 8.99   | 320.2351    | C <sub>20</sub> H <sub>32</sub> O <sub>3</sub>                | 5-HETE                           | ↑ <sup>△△</sup> | +   |
| 13  | 9.61   | 481.3168    | C <sub>23</sub> H <sub>48</sub> NO <sub>7</sub> P             | LysoPC(15:0)                     | ↓ <sup>△△</sup> | -   |

Note : ↑↓ indicates that the level of the marker is increased or decreased in the urine of rats in the ECB model group ;+&- indicates that the drug has no or no effect on the marker's recall; Compared with the control group, <sup>△</sup>P<0.05, <sup>△△</sup>P<0.01; Compared with the model group, \*P<0.05, \*\* P<0.01.
